# Supplementary material for: Structure of MlaFB uncovers novel mechanisms of ABC transporter regulation
Source: eLife journal article supplement (doi:10.7554/elife.60030), 2020-06-30
Supplement: supp [file elife_poa_e60030_Figure_2_figure_supplement_2.pdf › elife_poa_e60030_Figure_2_figure_supplement_2.pdf]

|                                     |                                                                  |     |
|-------------------------------------|------------------------------------------------------------------|-----|
| MlaF E. coli                        | -----MEQSVANLVDMRDVSFTGRNCRIFDNISLTVPRGKITAIMGPSG                | 44  |
| MlaF R. rickettsii                  | -----MSVEEFPIKIRLSYKSFANHVKLDGIDLDVKKGGSLVILGGSG                 | 43  |
| MlaF W. pipientis                   | -----MCNPVISIDLCSLYFNRRVLNLHNLNISRGKSLAILGGSG                    | 41  |
| MlaF E. ruminantium                 | -----MYCISLSDLTHAFHDHKILNGINLNNAVAYGESLVILGGSG                   | 39  |
| MlaF N. moscoviensis                | -----MLKLVGKVKKLGQQVQLQDILTTPPKLTITIGRSG                         | 37  |
| MlaF F. tularensis                  | -----MCDISFKNVSFYDRSRIYDDITFTIPTNKTITILGPSPG                     | 39  |
| MlaF N. gonorrhoeae                 | -----MSPSPFIEMKDVAFYAGDRPILNDINFSPQGNFAAVMGSSG                   | 42  |
| MlaF B. cepacia                     | -----MSPTPTTELLRLVDVFGDRLVLNLNLRFGRGOVVAMGGSG                    | 45  |
| MlaF P. aeruginosa                  | -----MSTDASAYVELKGLFLTFKRGSRAIFDNIDVRIPRGKVTIIMGPSG              | 44  |
| MlaF L. pneumophila                 | -----MPDNWNEIKLNFSLTDLDRCIFDGIDMVVKQKITAIMGPSG                   | 41  |
| MlaF A. baumannii                   | -----MNNKTPLSTQSLIEVKNLSFNNGRERVINYDNISLNIRRGQITAIMGPSG          | 48  |
| MlaF P. luteoviolaceae              | -----MESDLSQSIVEVKDVTFSGRSERVIYNKMSFSVPFRGKITAIMGPSG             | 45  |
| MlaF H. influenzae                  | -----MNQNLEIEVNKLTFFRKGRVIDYNLNLQVKKGKITAIMGPSG                  | 41  |
| MlaF V. cholerae                    | -----MSQSDLVTIKNLFRRSQRVFIDDIDLHVPGKVTIAIMGPSG                   | 42  |
| MlaF K. pneumoniae                  | ----MLARQVFSKDDFMSQTQANLVEVRGIRSRGDRIFFDISLVPRGKITAIMGPSG        | 56  |
| Teichoic Acid Exporter A. herbarius | MEHAVIVENVTKYKFLFKTSERLLMDLPGGYGEDFYALNRVSTADRGDVIGVGVNG         | 60  |
| O-Antigen Exporter A. aeolicus      | --MMIRVDFVWKYKYKYPQDRKEIIFRPKFHEELWLWKGINLIEKGEVLGIIVGPN         | 58  |
| Maltose Importer E. coli            | -----MASVOLQNVTKAWGEVVSVDINLDIHGEHFVVFVGPSSG                     | 39  |
|                                     | : . . . : * . *                                                  |     |
| MlaF E. coli                        | IGKTTLLRLIGGQIAPDHGEILFDGENIPAMSR-SRLYTvrkrmsmlfqsqgalfptdmnv    | 103 |
| MlaF R. rickettsii                  | SGKSVLKNIIVGLIKPDKGKIFINDVEIQDISS-KQKFEMMDGIGLFGQGLAFDSLNIR      | 102 |
| MlaF W. pipientis                   | SGKSVLAKTIICLLLLPDSGSIHV-----NS-----KSKSPGVLFQNSALFDYITW         | 87  |
| MlaF E. ruminantium                 | SGKSVLTKTILGLISPVSQGVIVDGDIVKHNS-----LSKNFQGVLFQNCALFDSLTV       | 93  |
| MlaF N. moscoviensis                | EKGSVLLRHMIIGLPDDEQGVWVDGVEISRGLRG-HALNEVRRKFRAMLFGCAALFDSMTV    | 96  |
| MlaF F. tularensis                  | AGKTTTLQLIAGLIKPTLGKICIDNAIEKNTKETOLEKLHRHMGLFQSGALFTHLSV        | 99  |
| MlaF N. gonorrhoeae                 | SGKTTLLRLITGQIRPQSQVGLIEGRDLAGFSA-DELYEHRRRMGVLFQHGALFDTLSV      | 101 |
| MlaF B. cepacia                     | CGKTTTVLRILIGGLVRARRGQVLPFGADVGAQTR-DGLYLALRRKMGMFLPFQGFALFDTMSV | 104 |
| MlaF P. aeruginosa                  | CGKTTLLRLIASQRLPRSKEGVWVNGQNLPLQLSR-GDLFPMRKQFQGVLFQSGALFTDLV    | 103 |
| MlaF L. pneumophila                 | SGKTTTLRLIGAQTIPDPGQIVYVNGQNLHQLSLR-KALYETRNMGLLPQGAALFTHLSV     | 100 |
| MlaF A. baumannii                   | TGKTTTLRLIGGQLPVDPHGEVLLDGGDKIAQMSR-QELFAARARMGMFLFQSGALFTHSV    | 107 |
| MlaF P. luteoviolaceae              | IGKTTMLRLIGGQLRVDPHGEVLLDGGDKIAQMSR-SELYQARKQSMFLFQSGALFDTMSV    | 104 |
| MlaF H. influenzae                  | IGKTTLLKLIGGQLMPEQGEILFDGQDICRLSN-RELYEVRKRKMGMFLFQSGALFTDISTF   | 100 |
| MlaF V. cholerae                    | IGKTTLLRLIGGQLLPEQGEIWFDPGENIPTLSR-RKLYRARKKMGMFLFQSGALFTDLNV    | 111 |
| MlaF K. pneumoniae                  | IGKTTTLRLIGGQIPDPGQIVYVNGQNLHQLSLR-SRLYTvrkrmsmlfqsqgalfptdmnv   | 103 |
| Teichoic Acid Exporter A. herbarius | SGKSTLSNIIAGILPPTSGETIKIDQG-ASLIAI-----SGTFNMQLTG                | 102 |
| O-Antigen Exporter A. aeolicus      | CGKSTLLRLITGVTEPDKGFVERSGVGLGLE-----GCTGFNYELSG                  | 103 |
| Maltose Importer E. coli            | CGKSTLLRMIAGLETITSGDLFIGEKRMDNTPP-----AERGVMVVFQSYALYPHLSVA      | 93  |
|                                     | * * . . . : * : :                                                |     |
| MlaF E. coli                        | DNVAYPLREHTQLPAHLTHSTMVMMKLEAVGLRG-AAKLMPSELSCGGMARRAALARAI      | 162 |
| MlaF R. rickettsii                  | DNITFTETK---NLSKKEKNDLAGAKLNAVGLSPRILEYPAELSGGMQRRVALARAICST     | 159 |
| MlaF W. pipientis                   | ENISFNKYKRRFINDKKAQKLAIEKLSNVGLEENISDMFPILIELSGGMKRRVALARAIAHN   | 147 |
| MlaF E. ruminantium                 | ENISFTNFHYRFCNNKNSAREIAASGKLNVLGSLNDVDLRYPIELSGGMKRRVALARAIAIVE  | 153 |
| MlaF N. moscoviensis                | ENVAFPLRERLRMKGAEVTKRVDEKLAQVGLCG-MGHKFPAAELSGGMKRRVALARALVMQ    | 155 |
| MlaF F. tularensis                  | DNIAFFPLRKNTNDELKLRINIIVLLKQAQVLAH-TINMMPSELSCGGMARRVALARSIAM    | 158 |
| MlaF N. gonorrhoeae                 | DNIAFFPMRELQPEAVIRDLVLLKANAVGLRG-VENLMPSELSCGGMARRVALARTIALD     | 160 |
| MlaF B. cepacia                     | ENVAFALREHTDLPDELIRDVLMLKLNNAVGLRG-AVLDMPSEVSCGGMARRVALARAIALD   | 163 |
| MlaF P. aeruginosa                  | ENVAFPLRVHTQLPEEMIRDIVMLKLNNAVGLRG-AVELMPDELSCGGMKRRVALARAIALD   | 162 |
| MlaF L. pneumophila                 | ENVAFPLREHTELNASMRINIIVMLKLEAVGLRG-AAHLMPAQELSGGMKRRVALARTIALD   | 159 |
| MlaF A. baumannii                   | ENVAPPIRAHTKLESNIEAELVALKLESVGLRG-TQLMPTLELSCGGMKRRVALARAIALD    | 166 |
| MlaF P. luteoviolaceae              | DNVAFPLREHTQLSEDILIRDVLMLKLNNAVGLRG-ARELMPAEELSGGMARRAALARAI     | 163 |
| MlaF H. influenzae                  | DNVAFPIREHTHPENLIRQIVLMKLEAVGLRG-AAALMPSELSCGGMARRAALARAI        | 160 |
| MlaF V. cholerae                    | DNVAYPLREHTEDEAMIKTVLLMLKLEAVGLRG-AAYLMPSELSCGGMARRAALARAI       | 159 |
| MlaF K. pneumoniae                  | DNVAYPLREHTHLPALLHTTMVMMKLEAVGLRG-AAKLMPSELSCGGMARRAALARAI       | 174 |
| Teichoic Acid Exporter A. herbarius | ENIELCKLM-LGFSKKQIKAMEPDIIEFADIFQ-FIDQPVKTYSSGGMKSRIGFAISVND     | 161 |
| O-Antigen Exporter A. aeolicus      | ENIVYNALS-LGLSRREIDKESLIEFSELDL-FINKPLKTYSSGGMIMRAFISIAHDE       | 160 |
| Maltose Importer E. coli            | ENMSFGLKLAGA-KKEVINQRNVQVAEVLQLAH-LLDRKPALKSGGRQRVAIGRTLVAE      | 151 |
|                                     | : * : : : * : * . . . : :                                        |     |
| MlaF E. coli                        | PILIMFDEPFVQGDPITMGVLVVKLISELNSALGVTCVVVSHDVEVLISADHWIALDKK      | 222 |
| MlaF R. rickettsii                  | PSILFLEDPTEGTGLDPIMANVINELIKIQEEALEATTITITHDMIASAATKEAVAMIYQKG   | 219 |
| MlaF W. pipientis                   | PEIIILDEPTEGSLDPIMSINVNEIIMSLSKNLHSTIVTTITHDIYSTFRANKIAVLYEGN    | 207 |
| MlaF E. ruminantium                 | PKIIILDEPTEGSLDPIPNDVINDIIVKCHKFKLITITITHDISSAFKIAKTIAYLAGK      | 213 |
| MlaF N. moscoviensis                | PEIILFDEPTEGSLDPIMAKSIHDLITSTQRTQFTGTAVMVSHIEPIEIFGISDYVAMLKQKC  | 218 |
| MlaF F. tularensis                  | PDIMIMDEPFTGQDPASPANKLELITLINESLNMTSIIVSHDIQELSISDHIIVGNK        | 215 |
| MlaF N. gonorrhoeae                 | PEIMLYDEPFTGLDPIISLGVIAHLISRVNKALRSTSIVMTHDIEKSLIVDQVIFLAHGE     | 220 |
| MlaF B. cepacia                     | PQLIMYDEPFTAGLDPIISLGITANLIRTLNEALGATSILVTHDVPESAIFAADIYVFLANG   | 223 |
| MlaF P. aeruginosa                  | PQLIMYDEPFVQGDPITMGVLVRLIRLLNDALGITSIVSHDLAETAISTADYIYVGDGR      | 222 |
| MlaF L. pneumophila                 | PVLMMYDEPFTGQDPISMGVLVRLIQRLNQLLHTTTIIVSHDVEETCSADYIYVLSGGK      | 219 |
| MlaF A. baumannii                   | PDLIMYDEPFTAGQDPISMGVLVRLIRLSREALDLTTIIVSHDVEPTLSADIYIVVAEGK     | 226 |
| MlaF P. luteoviolaceae              | PELIMYDEPFTAGQDPISMGVLVRLIRLSREALDLTTIIVSHDVEPTLSADIYIVVAEGK     | 223 |
| MlaF H. influenzae                  | PDLIMFDEPFTGQDPISMGVLSILKRLNEALNLTISIVVSHDVEEVLSTADYAYIIDQK      | 219 |
| MlaF V. cholerae                    | PELIMYDEPFVQGDPITMGVLVRLIRLLNDALGITSIVVSHDVEPTLSADIYVLDAGK       | 220 |
| MlaF K. pneumoniae                  | PDLIMYDEPFVQGDPITMGVLVRLISELNSLTGVTCIVVSHDVEPTLSADIYIVADKK       | 224 |
| Teichoic Acid Exporter A. herbarius | PDVLVIDEALSVDGQDTFADKDLKMN-EFKERKGTTFIFSHISIQGVKSCEKALMEYLEGE    | 230 |
| O-Antigen Exporter A. aeolicus      | PECFIIDQALAVGDAHQKQKCFRLK-EHKQKGGSIIPVSHDMNAVKILCDRAILLHKE       | 219 |
| Maltose Importer E. coli            | PSVFLDLPELNSLDALRVMQMRIESRLHKRLGRMTIYVTHDQVEAMTLADKIVVLDAGR      | 113 |
|                                     | * . . * : : . . * : :                                            |     |
| MlaF E. coli                        | IVAHSQAQALQANPDPRVRQFLDIADGVPVFRYPAGDYH-ADLLPGS----              | 269 |
| MlaF R. rickettsii                  | IKWYGSKDDMRNSDNPYLKQFINGLTFQIEV-----                             | 251 |
| MlaF W. pipientis                   | IFHGHTIKIEIQNSNNEYIKKFIAPVQFMS-----                              | 236 |
| MlaF E. ruminantium                 | IIVCESVQIEKNTDNQVVRNFITHRNY-----                                 | 239 |
| MlaF N. moscoviensis                | IAAMAPPAEFORTADPEITEIFISVGTGMALPAAPNRR-----                      | 252 |
| MlaF F. tularensis                  | IIASDSPENIKNSKDQIQNIFLAGK-----PLDYNHNHNDL-EKNFFPKKEILGS          | 267 |
| MlaF N. gonorrhoeae                 | IMFGSGPQEMERELDSPWVRQFVGLGADGPVYAIRYPAQTSL-QDQLLG-----           | 266 |
| MlaF B. cepacia                     | VLAQGTDPDLRASZDPSVRQFIDGADGVPFFKHYHTSPPLA-ADFLGGGR-A-            | 273 |
| MlaF P. aeruginosa                  | VLHGHTPDVLKETDDPRIQRQFKGIPDGVPVFFHPARDYR-ADLLGER-----            | 269 |
| MlaF L. pneumophila                 | IIGQGTPEELKRSEPIQIRQFMHGEADGVVFFHPAKPYT-EELLNA-----              | 265 |
| MlaF A. baumannii                   | IQGGTPEELQAYASPVKQPLTGSAAEFGVVEYFQSHQAYL-DNEVRP-----             | 272 |
| MlaF P. luteoviolaceae              | VIGSGSPQEMLAHSSPLVQQLPQLGSLDGPVFFHKAAPYE-EELLDGGV-----           | 271 |
| MlaF H. influenzae                  | VIAGETSEQLQSLQSDRLRVVQLKLGESDGPVFRFKYPAQDYV-KELFE-----           | 271 |
| MlaF V. cholerae                    | VIAGGSFQALRDNPDPRVQQLCGDADGVPVFRFPQAQPIE-QELFSAK-----            | 267 |
| MlaF K. pneumoniae                  | IVAHSQAQSLRENTDPRVRQFIDGIADGVPVFRYPAGDYH-HDLLPGS----             | 282 |
| Teichoic Acid Exporter A. herbarius | VRGYVTVAEIIIPQYKFLKEYRMSDKERQYKERVMRKQQGEFLQAAYK-----            | 270 |
| O-Antigen Exporter A. aeolicus      | IEEGSPETVTVQAQYKL-----                                           | 236 |
| Maltose Importer E. coli            | VAQVQGFLELHYHPAD-----                                            | 277 |
