# Supplementary material for: Structure of MlaFB uncovers novel mechanisms of ABC transporter regulation
Source: eLife journal article supplement (doi:10.7554/elife.60030), 2020-06-30
Supplement: supp [file elife_poa_e60030_Figure_5_figure_supplement_1.pdf › elife_poa_e60030_Figure_5_figure_supplement_1.pdf]

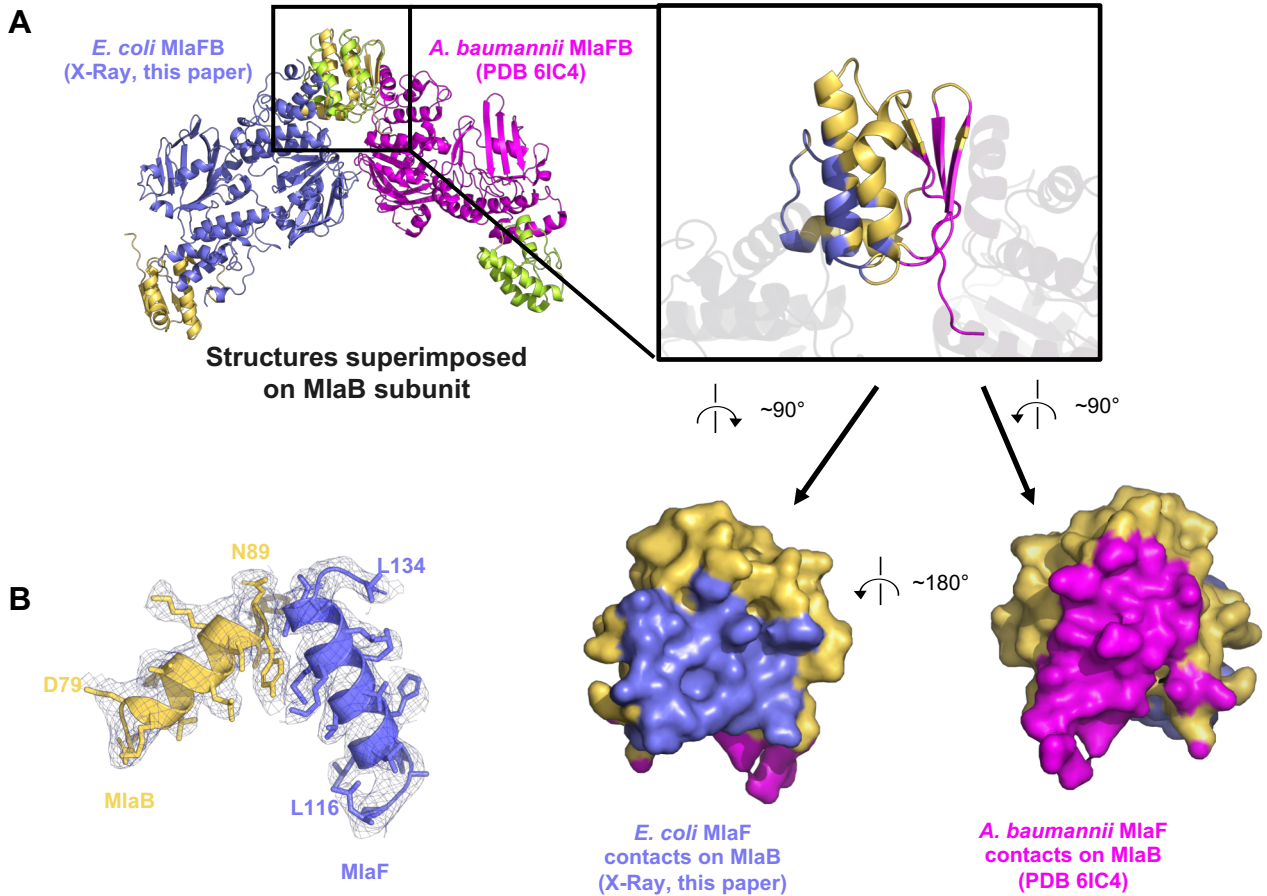

**C**

MlaF *E. coli* ---MEQSVANLVDMRDVSFTRGNRCIFDNISLTVPRGKITAIMGPSGIGKTTLLRLIGG 56  
MlaF *A. baumannii* MNNKTPLSTQSLIEVKNLSFNRGERVYDNIISLNIRRGQITAIMGPSGTGKTTLLRLIGG 60  
\* . \* . : : : : \* . \* . \* . : : \* . : : : : \* . : : : : \*

MlaF *E. coli* QIAPDHGEILFDGENIPAMSRSLRYTVKRMSMLFQSGALFTDMNVFDNVAYPLREHTQL 116  
MlaF *A. baumannii* QLVDPDQGEVLLDGKDIAQMSRQELFAARARMGMLFQSGALFTDMSVYENVAFPPIRAHTKL 120  
\* . : . \* . : . : . : \* . \* . : . : . : \* . : . : . : . : . : \* . : . : . : \*

MlaF *E. coli* PAPLLHSTVMMKLEAVGLRGAAKLMPSELSGGMARRAALARAIALEPDLIMFDFPFVQGQD 176  
MlaF *A. baumannii* SENLIAELVALKLESVGLRGTEQLMPTELSGGMNRRVALARAIALDPDLIMYDEFPFAGQD 180  
\* . : . \* . : . : . : \* . : . : . : \* . : . : . : \* . : . : . : \* . : . : . : \*

MlaF *E. coli* PITMGVLVKLISELNSALGVTCVVVSHDVPVLSIADHAWILADKKIVAHGSAQALQANP 236  
MlaF *A. baumannii* PIVKGVLTIRLSREALDLTTIIVSHDVPETLSIADYIIVVAEGKIQEGTPEELQAYA 240  
\* . : . \* . : . : . : \* . : . : . : \* . : . : . : \* . : . : . : \* . : . : . : \*

MlaF *E. coli* DPRVRQFLDGIADGPPVFRYPAGDYHADLLPGS 269  
MlaF *A. baumannii* SPFVKQFLTGSAGPVEYQFSHQAYLDNEVRP- 272  
. \* . : . : \* . : . : . : \* . : . : . : \* . : . : . : \*

**D**

MlaB *E. coli* MSESLSWMQTGDTLALSGELDQDVLLPLWEMREEAVKGIT---CIDLSRVSVDVTGGLA 56  
MlaB *A. baumannii* ---MVQY--LNQELVVS GKIDFENAEQQYQAGLAIKKQTSFPLIVDLKQLEHGNTLALA 55  
: . : . : . : . : . : \* . : . : . : \* . : . : . : \* . : . : . : \*

MlaB *E. coli* LLLHLIDLAKKQGNNVTLQGVNDKVYTLAKLYNLPADVLP 97  
MlaB *A. baumannii* VLVQWLRQT-PQKSLGHFKNVPEKMLKIIQACHLQEDLHLV 95  
\* . : . : . : \* . : . : . : \* . : . : . : \* . : . : . : \*
