# Supplementary figures and images for: Structure of MlaFB uncovers novel mechanisms of ABC transporter regulation
Source: eLife journal article supplement (doi:10.7554/elife.60030), 2020-06-30

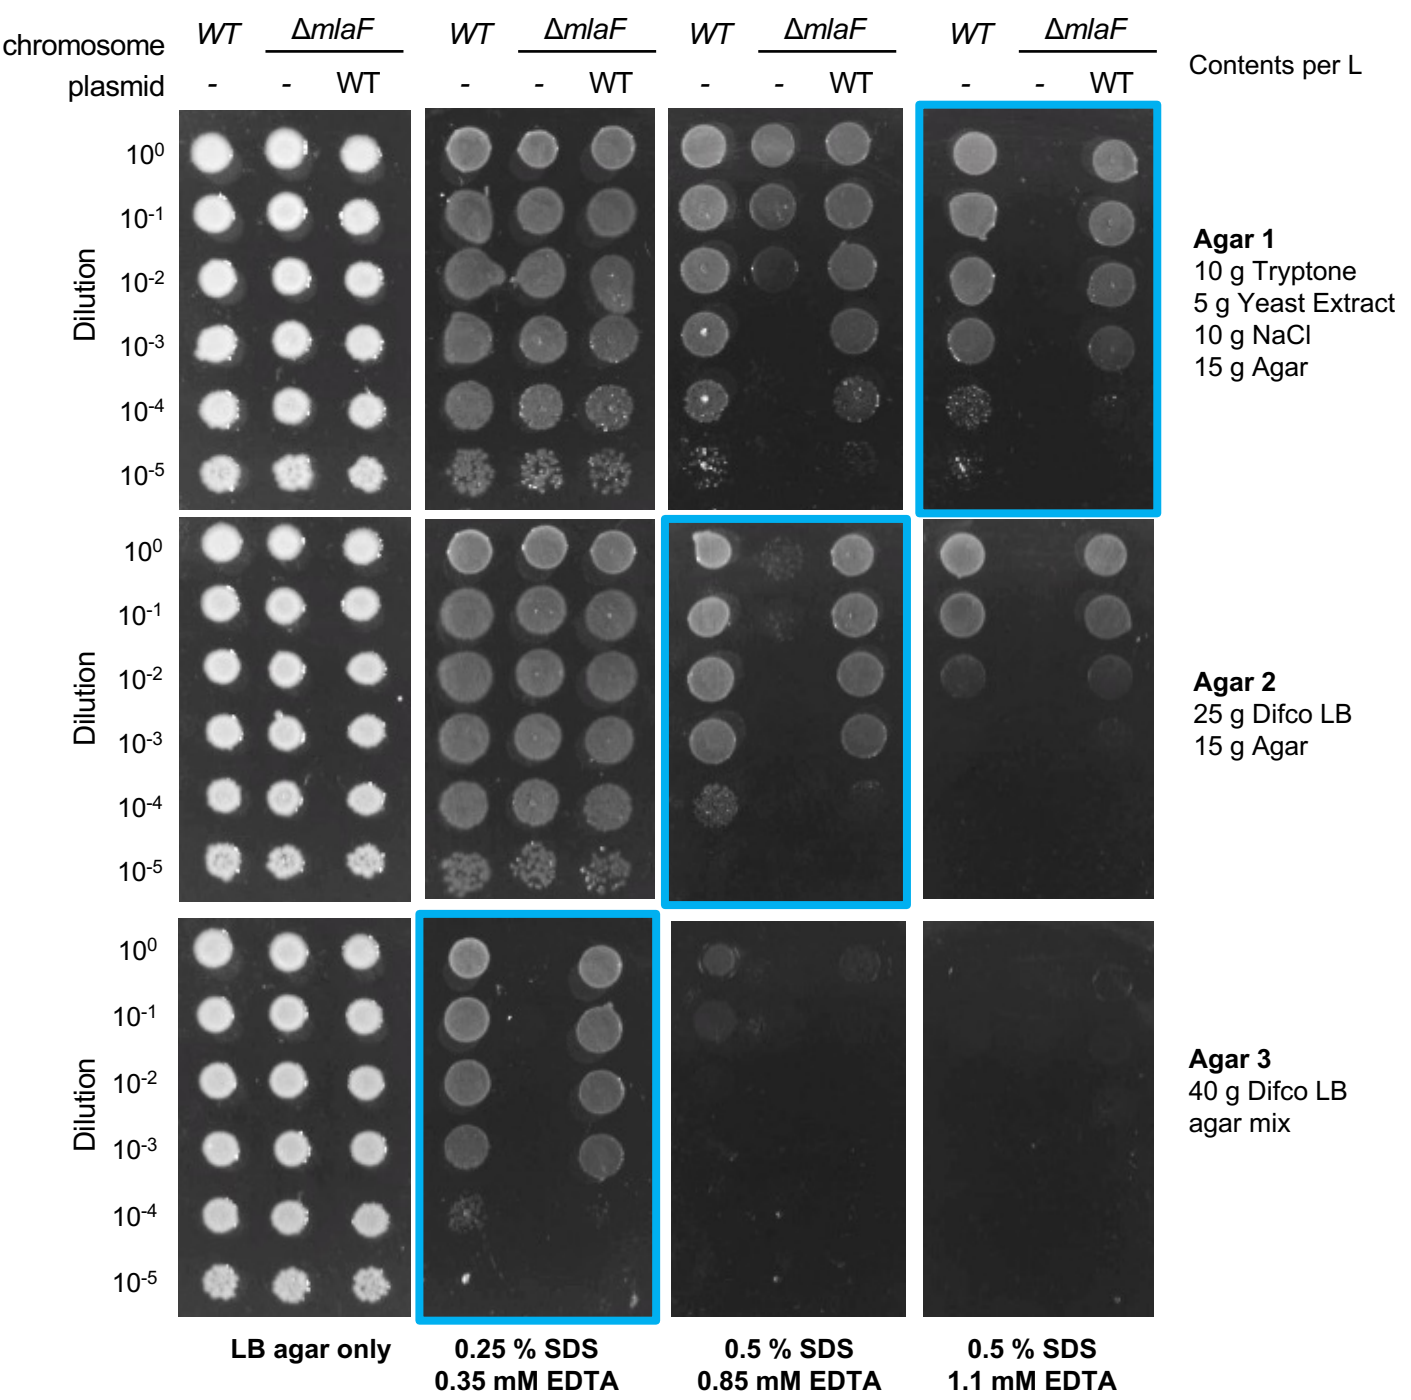

Supplement: supp [file elife_poa_e60030_Figure_1_figure_supplement_1.pdf › elife_poa_e60030_Figure_1_figure_supplement_1.pdf]

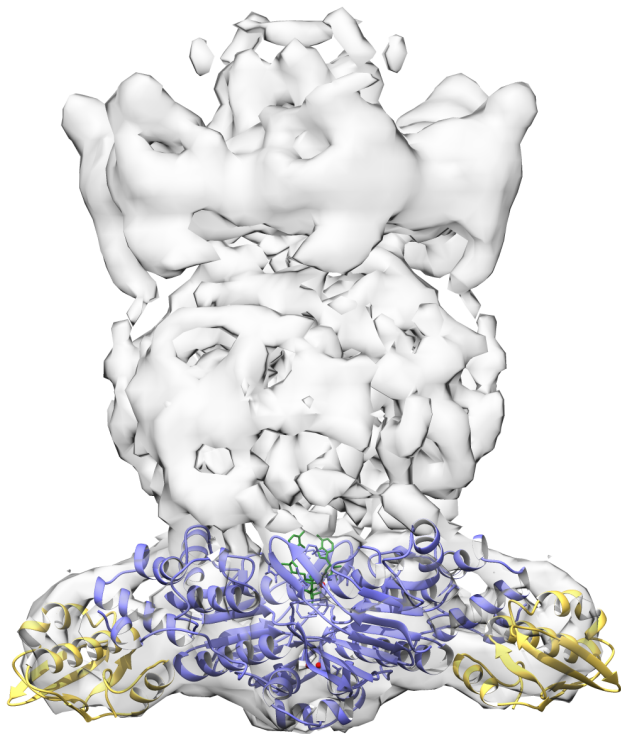

Supplement: supp [file elife_poa_e60030_Figure_1_figure_supplement_2.pdf › elife_poa_e60030_Figure_1_figure_supplement_2.pdf]

**A**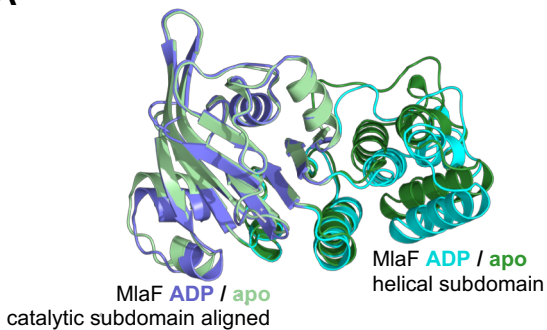**B**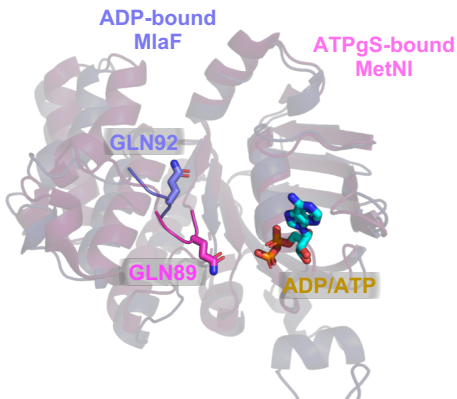

Supplement: supp [file elife_poa_e60030_Figure_2_figure_supplement_1.pdf › elife_poa_e60030_Figure_2_figure_supplement_1.pdf]

**A**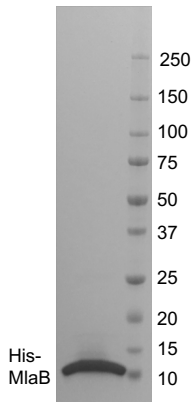**B**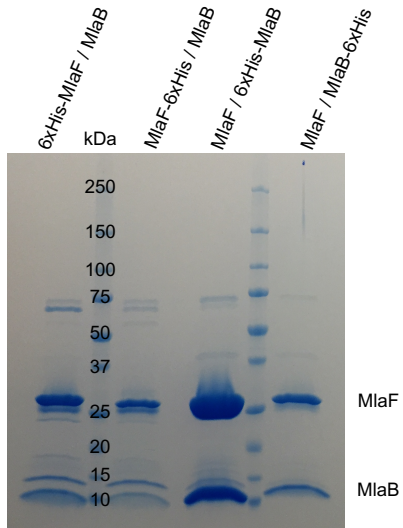

Supplement: supp [file elife_poa_e60030_Figure_5_figure_supplement_2.pdf › elife_poa_e60030_Figure_5_figure_supplement_2.pdf]
